# Supplementary material
Source: PubMed Central journal article supplement (PMC6237223)

**A**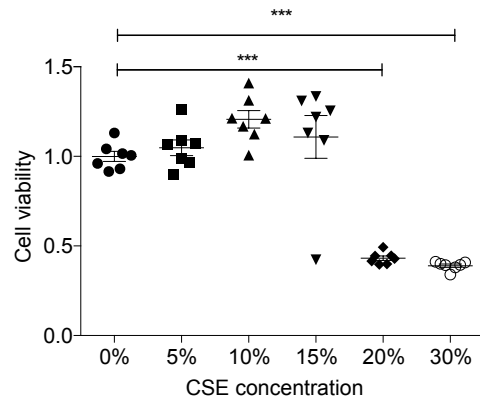

**Supplemental Figure 1. CS induces cell injury in an in vitro model of COPD. (A)** HK-2 cell viability upon exposure for 24h to increasing concentrations of cigarette smoke extract (CSE), measured by alamar Blue assay. Data are mean ± SEM. \*\*\* $P < 0.001$  by one-way ANOVA with Bonferroni post-hoc test, dot plots represent quantitation of 3 independent experiments.

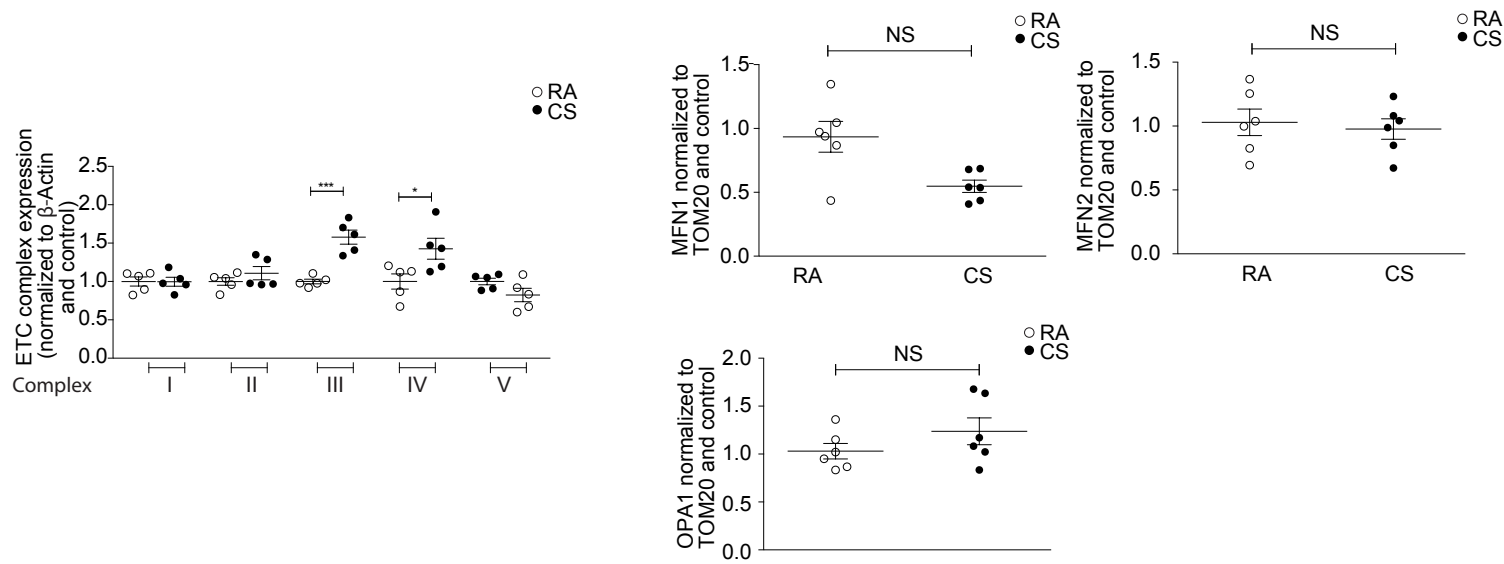

**Supplemental Figure 2. Cigarette smoke induces oxidative stress and mitochondrial injury in a murine model of COPD.** (A) Electron transport chain (ETC) complexes expression in kidney tissue of mice exposed to 6 months of cigarette smoke (CS) vs. room air (RA) control ( $n = 5$  in each group). (B) Expression of proteins that regulate mitochondrial dynamics in the kidney tissue from mice exposed to 6 months CS or RA, Mitofusin1 (MFN1), Mitofusin2 (MFN2) and Dynamin-like 120-kDa protein (OPA1) ( $n = 6$  in each group). All data are mean  $\pm$  SEM. \* $P < 0.05$ , \*\*\* $P < 0.001$ , NS (non-significant) by Student's t test.

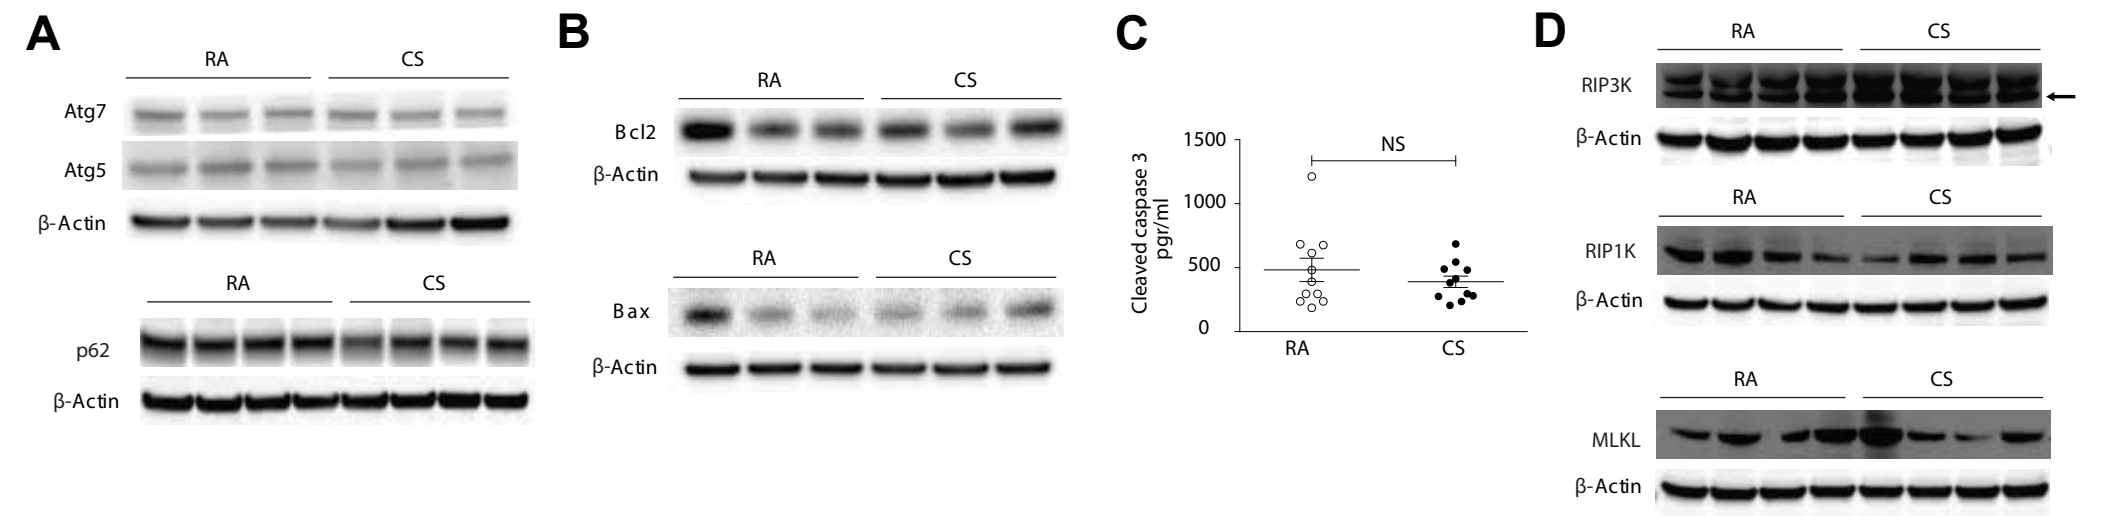

**Supplemental Figure 3: Autophagy is selectively induced in mouse kidneys after cigarette smoke exposure.** (A) Representative blots from additional autophagy cascade proteins such as autophagy-related protein 7 and 5 (ATG7, ATG5) and p62/SQSTM1 expression in kidney tissue from mice exposed to CS or RA for 6 months ( $n = 3$  in each group) (B) Anti- and pro-apoptotic proteins Bcl-2 and Bax expression in CS-exposed vs. control RA-exposed mice ( $n = 3$  in each group). (C) Cleaved caspase-3 levels measured by ELISA in whole kidney tissue homogenates ( $n = 8$  in each group). Data are mean  $\pm$  SEM, analyzed by 2-tailed Student's t-test. (D) Representative western blot of necroptosis proteins: receptor-interacting serine/threonine-protein kinase-1 (RIPK1), receptor-interacting serine/threonine-protein kinase-3 (RIPK3) and mixed lineage kinase domain-like (MLKL) expression in kidney tissue after 6 months of CS or RA exposure ( $n = 4$  in each group).

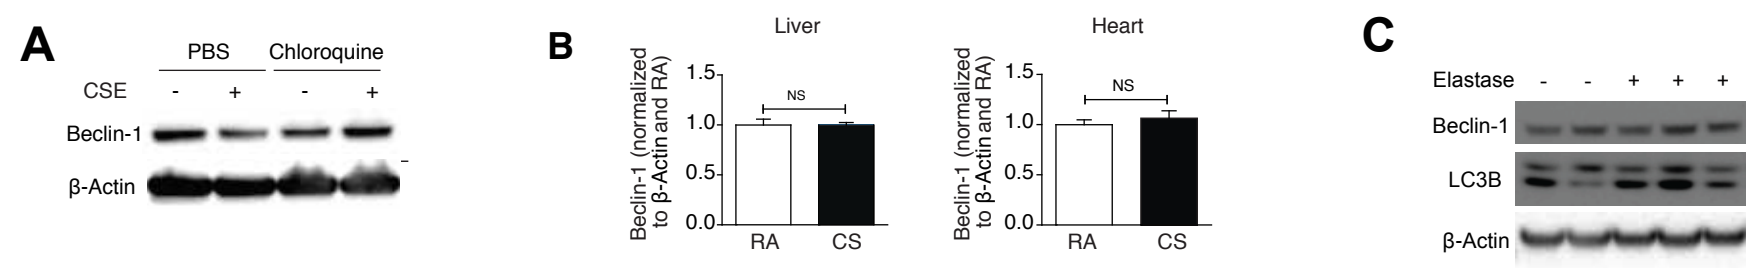

**Supplemental Figure 4. The Beclin-1 response in kidney is specific for CS-mediated renal damage. (A)** Beclin-1 expression upon blockage of autophagic flux in vitro with chloroquine. **(B)** Quantification of Beclin-1 expression in the liver ( $n = 8$  in each group) and heart tissues ( $n = 8$  for RA,  $n = 7$  for CS) of mice exposed to CS for 6 months, data are mean  $\pm$  SEM. NS (non-significant) by 2-tailed Student's  $t$  test. **(C)** Beclin-1 expression in kidney tissue after in vivo elastase exposure ( $n = 2$  for control,  $n = 3$  for elastase).

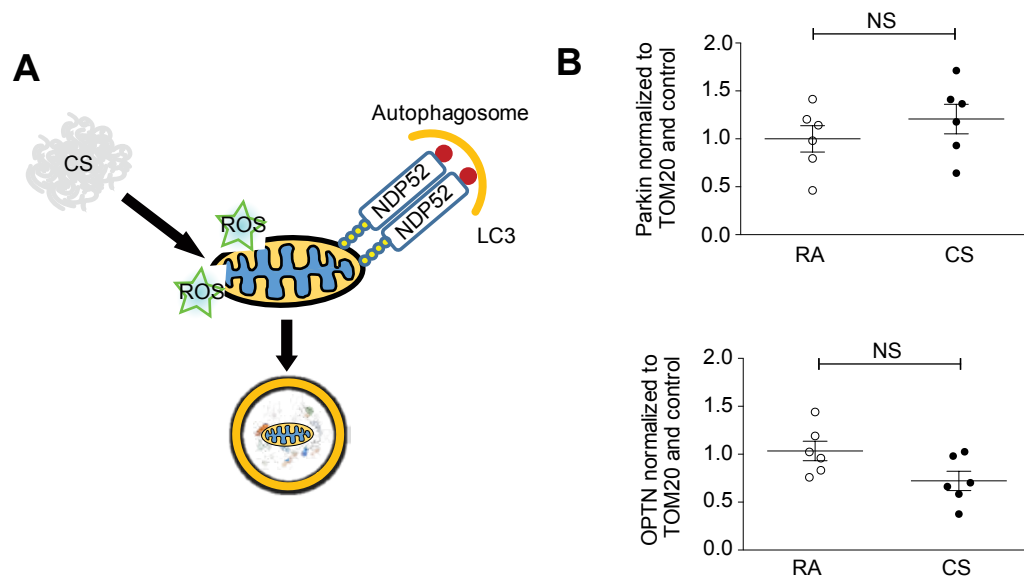

**Supplemental Figure 5: *Becn1*<sup>+/-</sup> mice have decreased mitophagy at baseline which does not increase after CS exposure. (A)** Diagram representing calcium-binding and coiled-coil domain-containing protein2 (NDP52) mediated mitophagy. Injured mitochondria are ubiquitinated and recognized by autophagosomes via LC3B binding units present in mitophagy receptors such as NDP52. **(B)** Quantification of Western blots from Parkin and Optineurin (OPTN), proteins involved in the mitophagy cascade ( $n = 6$  in each group). All data are mean  $\pm$  SEM, NS (non-significant) analyzed by Student's t test.

Full unedited gel for Figure 1

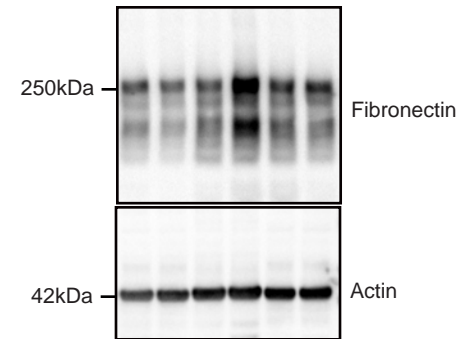

Full unedited gels for Figure 2

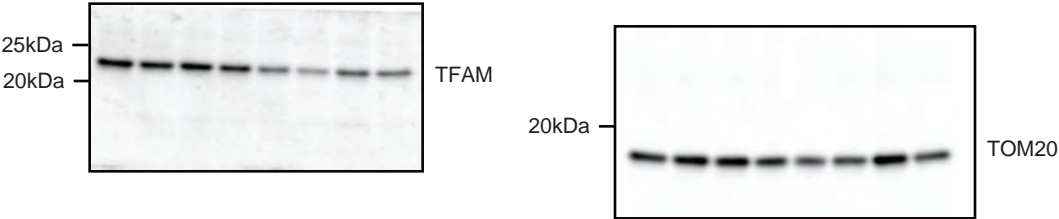

Full unedited gels for Figure 3

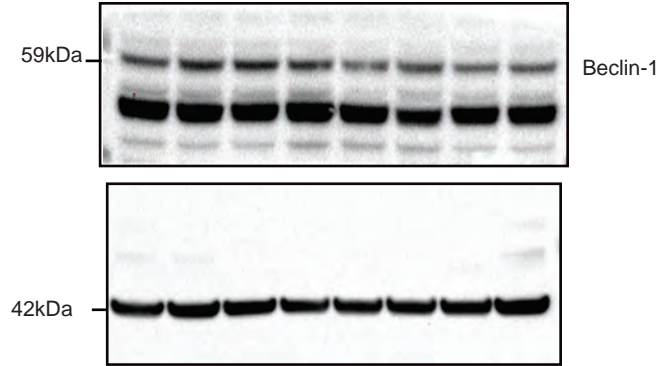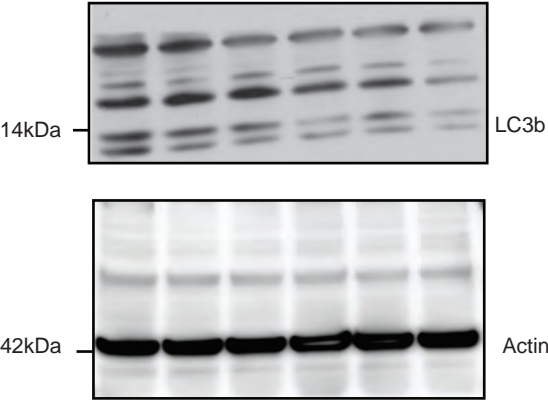

Full unedited gels for Figure 4

fig 4b (left)

LC3B

$\beta$ -Actin

fig 4b (right)

59kDa

Beclin-1

59kDa

Beclin-1

14kDa

LC3b

14kDa

LC3b

42kDa

$\beta$ -Actin

42kDa

$\beta$ -Actin

figure 4C

59kDa

Beclin-1

14kDa

LC3b

42kDa

$\beta$ -Actin

Full unedited gel for Figure 5

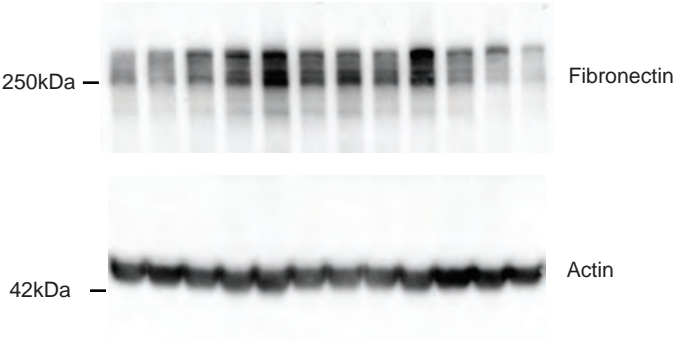

Full unedited gel for Figure 7

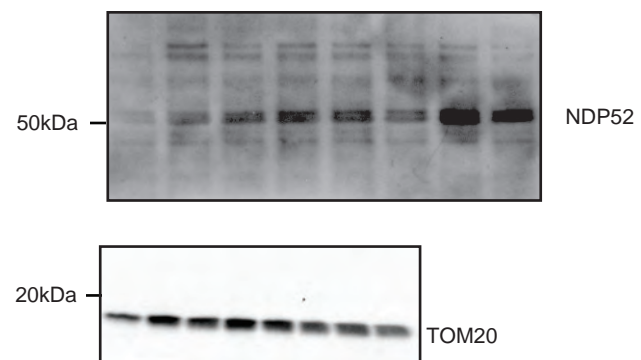

Western blots for supplemental Figure 3

PANEL S3A

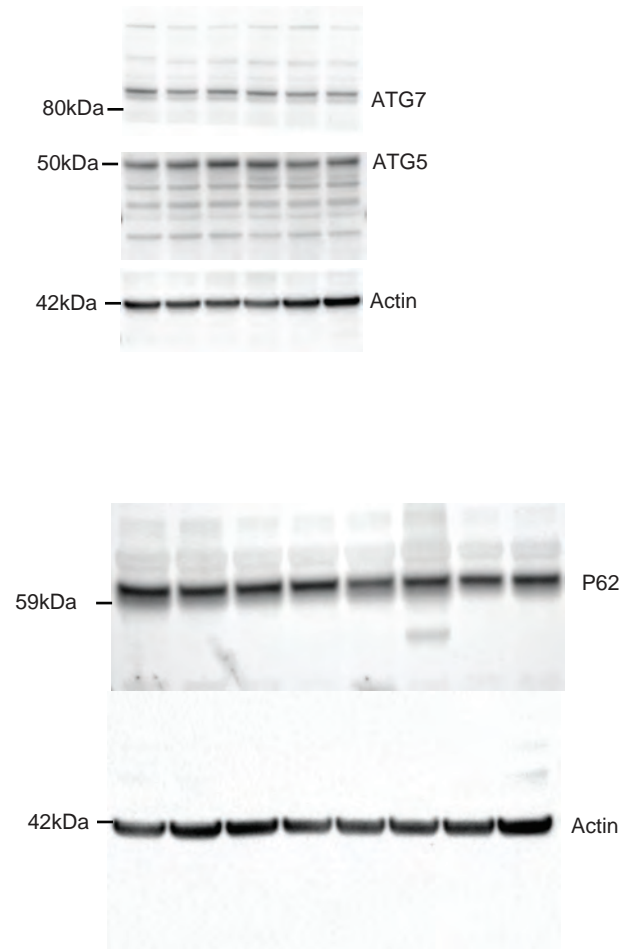

PANEL S3B

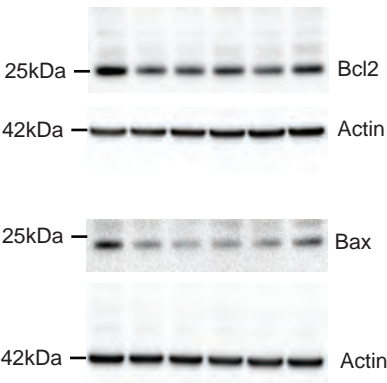

PANEL S3D

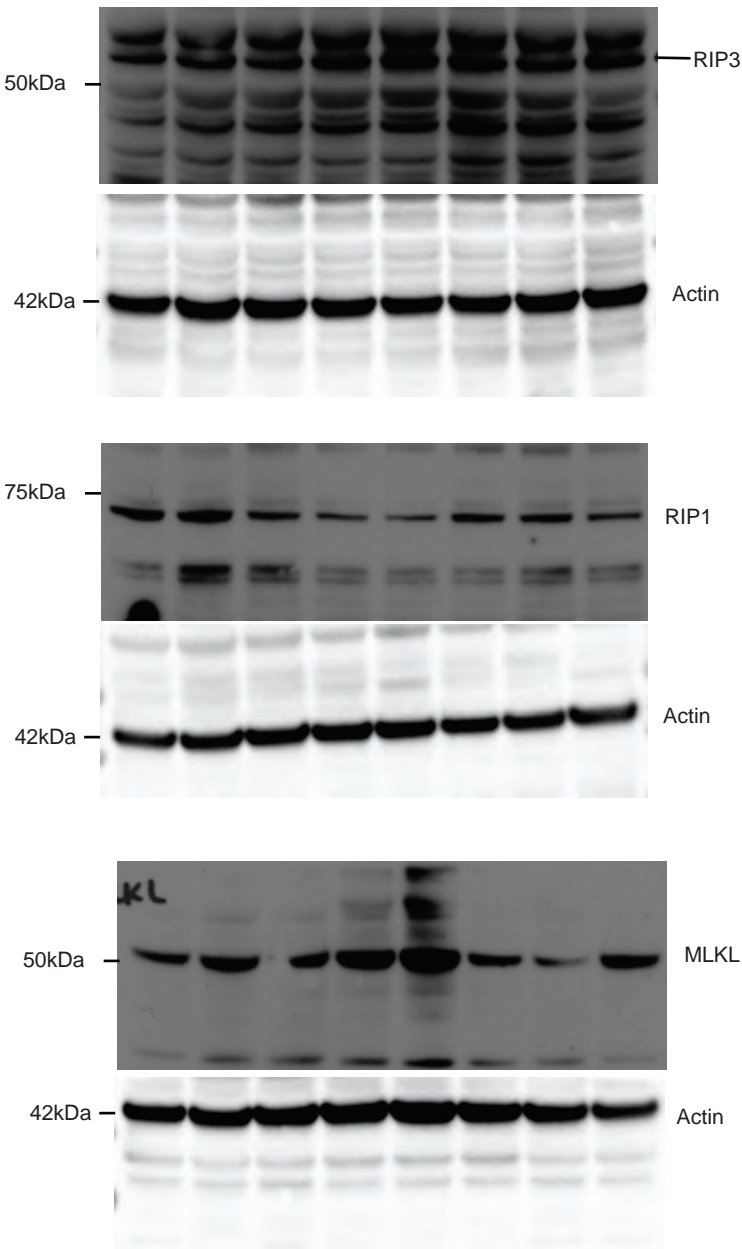

Western blots for Supplement Figure 4.

Panel S4A

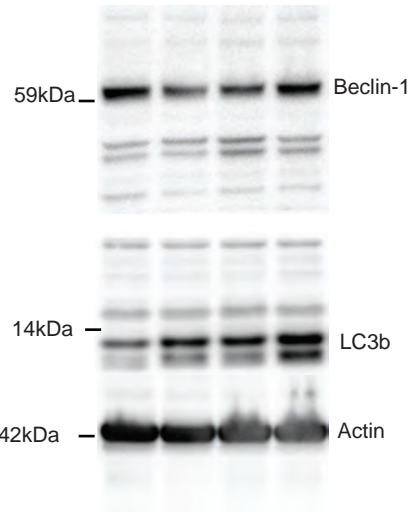

Panel S4C

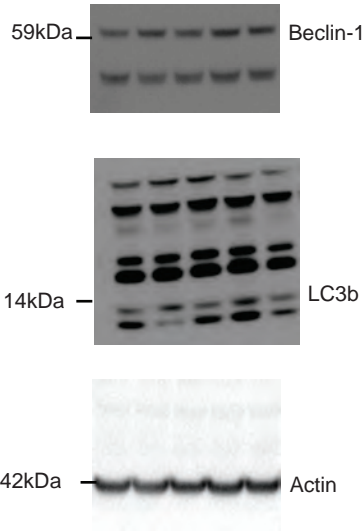

Supplement: jciinsight-3-99592-s235.pdf [file jciinsight-3-99592-s235.pdf]
